# Supplementary material for: Construction of OH-functionalized MWCNT/solid waste composites with tubular/spherical heterostructures for enhanced electromagnetic wave absorption property
Source: Royal Society of Chemistry journal article supplement (doi:10.1039/d2ra01960d), 2022-01-01
Supplement: d2ra01960d1.pdf [file d2ra01960d1.pdf]

## Supplementary Information

### Construction of OH-functionalized MWCNTs/solid waste composites with tubular/spherical heterostructures for the enhanced electromagnetic wave absorption property

Mengzhu Liu,<sup>a,b</sup> Hongwei Wang,<sup>a</sup> Yangyang Lv,<sup>a</sup> Yingyuan Zhang,<sup>a</sup> Yongpeng Wang,<sup>\*a</sup> Haibo Zhang<sup>b</sup>  
and Zhenhua Jiang<sup>b</sup>

<sup>a</sup>College of Materials Science and Engineering, Jilin Institute of Chemical Technology, Jilin, 132022,  
China

<sup>b</sup>College of Chemistry, Jilin University, Changchun, 130012, China

E-mail: wyp4889@163.com

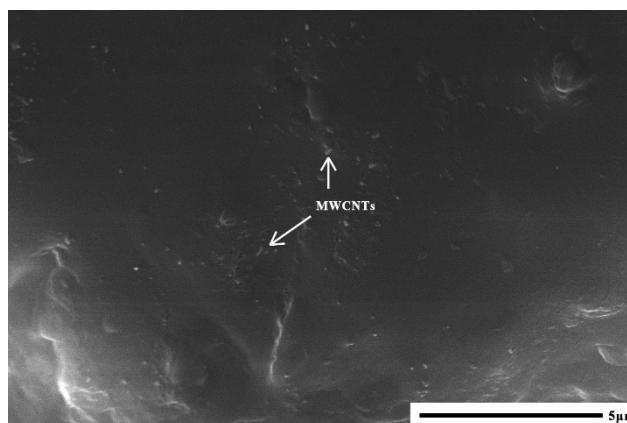

Fig.S1. SEM image of MFACs, in which FAC was broken and the MWCNTs located inside the cenospheres.

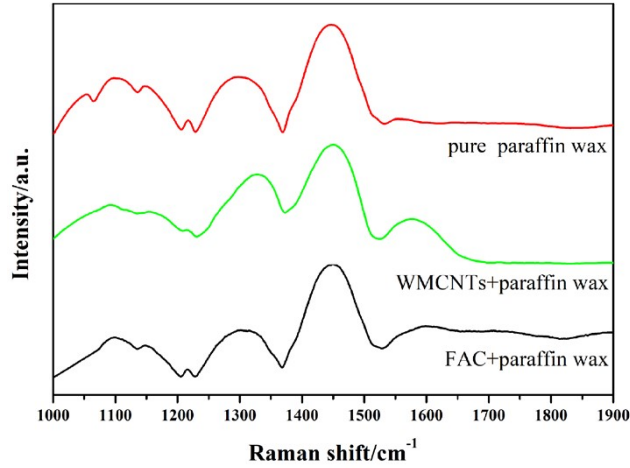

Fig.S2. Raman spectra of different samples.

Table S1. Typical C-based composites for EM wave absorption.

| Sample                                                                | RL <sub>min</sub><br>(dB) | Optimum<br>Frequency (GHz) | Frequency range (RL≤-<br>10dB) | Refs.     |
|-----------------------------------------------------------------------|---------------------------|----------------------------|--------------------------------|-----------|
| CNT/Fe nanocapsulates                                                 | -25                       | 11                         | --                             | 50        |
| Porous Co/C Nanocomposites                                            | -35.3                     | 5.8                        | 5.80 (8.40 –14.20)             | 51        |
| Co/CNTs                                                               | -36.5                     | 4.1                        | 1 (3.6-4.6)                    | 52        |
| porous carbon/Co nanocomposites                                       | -40                       | 4.2                        | 0.7 (about 3.8-4.5)            | 53        |
| CoFe <sub>2</sub> O <sub>4</sub> hollow sphere/graphene<br>composites | -18.5                     | 12.9                       | 3.7 (11.3-15)                  | 54        |
| Fe <sub>3</sub> O <sub>4</sub> /C core-shell nanospindles             | -38.8                     | 11                         | 2.2 (about 9.8-12)             | 55        |
| porous RGO/γ-Fe <sub>2</sub> O <sub>3</sub> composites                | -39                       | 14.78                      | 3.5 (12.5-16)                  | 56        |
| nano-Fe <sub>3</sub> O <sub>4</sub> compact-coated CNTs               | -43.0                     | 15.4                       | 8.3                            | 57        |
| RGO/ZnO hollow spheres                                                | -45.05                    | 9.7                        | 3.3 (8.8-12.1)                 | 58        |
| MWCNTs/FAC composites                                                 | -44.67                    | 4.9                        | 3.62 (10.68-14.30 )            | This work |

## Reference

50. R. C. Che, L. M. Peng, X. F. Duan, Q. Chen, and X. L. Liang, *Adv. Mater.*, 2004, **16**, 401.
51. Y. Lv, Y. Wang, H. Li, Y. Lin, Z. Jiang, Z. Xie, Q. Kuang, and L. Zheng, *ACS Appl. Mater. Interfaces*, 2015, **7**, 13604.
52. N. Wu, H. Lv, J. Liu, Y. Liu, S. Wang, and W. Liu, *Phys. Chem. Chem. Phys.*, 2016, **18**, 31542.
53. Q. Liu, D. Zhang, and T. Fan, *Appl. Phys. Lett.*, 2008, **93**, 013110.
54. M. Fu, Q. Z. Jiao, Y. Zhao and H. S. Li, *J. Mater Chem A.*, 2014, **2**, 735.
55. X. Liu, X. Cui, Y. Chen, X. Zhang, R. Yu, G. Wang, and H. Ma, *Carbon*, 2015, **95**, 870.
56. T. Wang, Y. Li, L. Wang, C. Liu, S. Geng, X. Jia, F. Yang, L. Zhang, L. Liu, B. You, X. Ren, and H. Yang, *RSC Adv.*, 2015, **5**, 60114.
57. N. Li, G. Huang, Y. Li, H. Xiao, Q. Feng, N. Hu, and S. Fu, *ACS Appl. Mater. Interfaces*, 2017, **9**, 2973.
58. M. Han, X. Yin, L. Kong, M. Li, W. Duan, L. Zhang, and L. Cheng, *J. Mater. Chem. A.*, 2014, **2**, 16403.
